# Supplementary material for: Gastroprotective Effects of Ganoderma lucidum Polysaccharides with Different Molecular Weights on Ethanol-Induced Acute Gastric Injury in Rats
Source: MDPI journal article supplement (doi:10.3390/nu14071476), 2022-04-01
Supplement: s1 [file s1]

**Table S1.** Ulcer index and gastric protection rate (n=10)

| Group    | Ulcer index ( $\bar{X} \pm SD$ ) | Ulcer inhibition rate (%) |
|----------|----------------------------------|---------------------------|
| Blank    | 0                                | 100%                      |
| Model    | 28.37±9.41                       | 0 <sup>a</sup>            |
| Positive | 12.73±3.40                       | 55.13 <sup>b</sup>        |
| GLP100-H | 11.92±2.33                       | 57.98 <sup>c</sup>        |
| GLP100-M | 12.53±5.10 <sup>b</sup>          | 55.83 <sup>b</sup>        |
| GLP100-L | 15.62±4.76                       | 44.94 <sup>b</sup>        |
| GLP10-H  | 14.56±3.37                       | 48.68 <sup>b</sup>        |
| GLP10-M  | 13.93±4.11                       | 50.90 <sup>b</sup>        |
| GLP10-L  | 12.21±4.77                       | 56.97 <sup>c</sup>        |
| GLP1-H   | 15.21±5.23                       | 46.39 <sup>b</sup>        |
| GLP1-M   | 16.32±7.73                       | 42.47 <sup>b</sup>        |
| GLP1-L   | 15.27±6.39                       | 46.17 <sup>b</sup>        |

Different lowercase letters indicate significant differences among treatments ( $P < 0.05$ ).

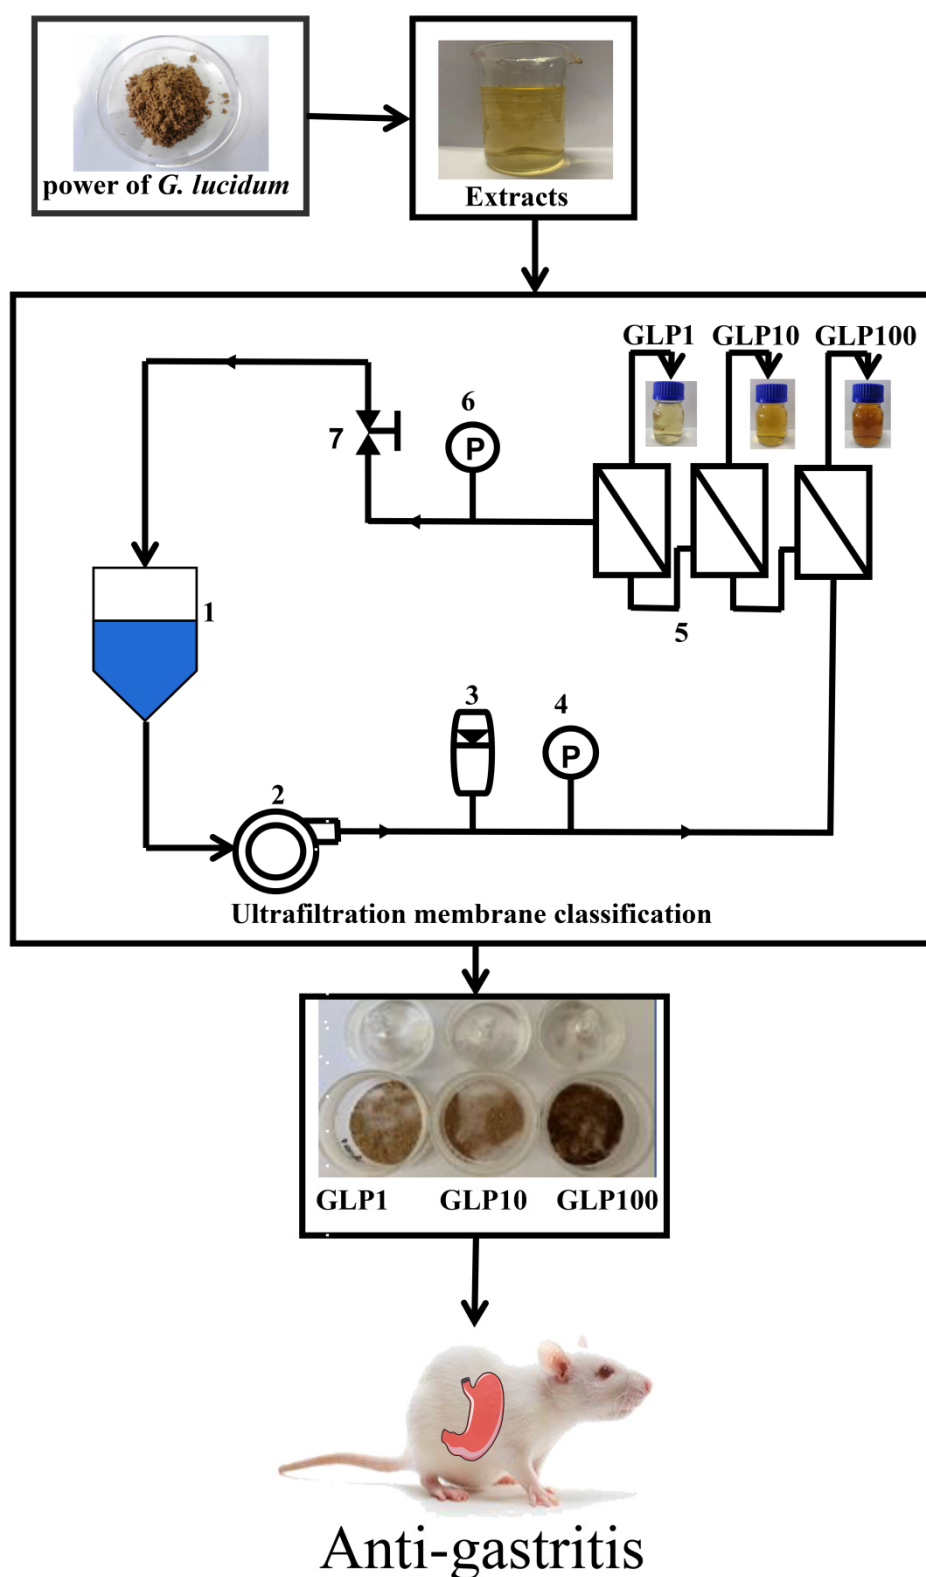

**Figure S1.** Membrane fractionation and anti-gastritis activities of GLPs

Note: (1) feed tank (2) pump (3) flowmeter (4, 6) pressure gauge (5) membrane module (7) feed valve
